# Supplementary material for: Graph-distance distribution of the Boltzmann ensemble of RNA secondary structures
Source: Springer Nature journal article supplement (doi:10.1186/1748-7188-9-19), 2014-09-11
Supplement: 13015_2013_221_MOESM1_ESM.pdf [file 13015_2013_221_MOESM1_ESM.pdf]

# Additional File 1: GRAPH-DISTANCE DISTRIBUTION OF THE BOLTZMANN ENSEMBLE OF RNA SECONDARY STRUCTURES

April 27, 2014

## 1 Appendix A: Proof of the $E[d_G(v, w)] = \sum_d d \times \frac{Z^{v,w}[d]}{Z}$

**Proof:**  $E[d_G(v, w)] = \sum_d d \times \frac{Z^{v,w}[d]}{Z}$

$$\begin{aligned} E[d_G(v, w)] &= \sum_G d_G(v, w) \times Pr[G|\xi] = \sum_d \sum_{G \text{ with } d_G(v,w)=d} d \times \frac{e^{-f(G)/RT}}{Z} \\ &= \sum_d d \times \frac{\sum_{G \text{ with } d_G(v,w)=d} e^{-f(G)/RT}}{Z} = \sum_d d \times \frac{Z^{v,w}[d]}{Z} \end{aligned}$$

## 2 Appendix B: The conditional probability for $i$ to be single-stranded can be determined from the partition function for RNA folding.

**Theorem 2.1** *The expected distance  $E[d_{i,j}^G]$  can be calculated as:*

$$E[d_{i,j}^G] = (a + E[d_{i+1,j}^G]) \cdot \frac{1 \cdot Q_{i+1,j}}{Q_{i,j}} + \sum_{i < k \leq j} (b + E[d_{k+1,j}^G]) \cdot \frac{Q_{i,k}^b \cdot Q_{k+1,j}}{Q_{i,j}} \quad (1)$$

Let  $G$  be a structure. For simplicity of notation, we write  $G = \bullet G'$  if the first position is unpaired, and  $G = (\dots)_j G'$  if the first base is paired to some position  $j$ , and  $G'$  is the substructure of  $G$  starting from position  $j + 1$ . Alternatively, we may use the notation  $(i, j) \in G$  for the case where the position  $i$  and  $j$  are base paired in  $G$ .

The expected length  $E[d_G(i, j)]$  can be calculated as: follows:

$$\begin{aligned}
E[d_G(i, j)] &= \sum_{G \text{ struct. of } \xi[i \dots j]} d_G(i, j) Pr[G|\xi[i \dots j]] \\
&= \sum_{G=\bullet G'} (a + d_{G'}(i, j)) Pr[G|\xi[i \dots j]] + \sum_{i < k \leq j} \sum_{G=(\dots)_k G'} (b + d_{G'}(i, j)) Pr[G|\xi[i \dots j]] \\
&\stackrel{\text{def.}}{=} EL_{sg} + \sum_{i < k < j} EL_{bp(k)}
\end{aligned}$$

Now  $EL_{sg}$  can be simplified as follows:

$$\begin{aligned}
EL_{sg} &= \sum_{G=\bullet G'} (a + d_{G'}(i, j)) Pr[G|\xi[i \dots j]] \\
&= \left( \sum_{G=\bullet G'} a \cdot Pr[G|\xi[i \dots j]] \right) + \left( \sum_{G=\bullet G'} d_{G'}(i, j) \cdot Pr[G|\xi[i \dots j]] \right) \\
&= a \cdot Pr[G = \bullet G'|\xi[i \dots j]] + \left( \sum_{G=\bullet G'} d_{G'}(i, j) \cdot Pr[G|\xi[i \dots j]] \right),
\end{aligned}$$

where  $Pr[G = \bullet G'|\xi[i \dots j]]$  can be calculated as the probability of the first position to be single-stranded in the sequence  $\xi[i \dots j]$ , i.e.,

$$Pr[G = \bullet G'|\xi[i \dots j]] = \frac{1 \cdot Q_{i+1, j}}{Q_{i, j}}$$

We are also able to push the second term since

$$\sum_{G=\bullet G'} d_{G'}(i, j) \cdot Pr[G|\xi[i \dots j]] = \sum_{G'} d_{G'}(i, j) \cdot Pr[\bullet G'|\xi[i \dots j]]$$

Now we know that for every  $G'$  we have that the Boltzmann weighted energy of  $G'$  is part of the partition function of  $Q_{i+1,j}$ . Thus we get

$$\begin{aligned}
&= \sum_{G'} d_{G'}(i, j) \cdot \frac{\exp(-E(\bullet G')/kT)}{Q_{i,j}} \\
&= \sum_{G'} d_{G'}(i, j) \cdot \frac{\exp(-E(G')/kT)}{Q_{i+1,j}} \frac{Q_{i+1,j}}{Q_{i,j}} \\
&= \frac{Q_{i+1,j}}{Q_{i,j}} \sum_{G'} d_{G'}(i, j) \cdot \frac{\exp(-E(G')/kT)}{Q_{i+1,j}} \\
&= Pr[G = \bullet G' | \xi[i \dots j]] \sum_{G'} d_{G'}(i, j) \cdot Pr[G' | \xi[i + 1 \dots j]] \\
&= Pr[G = \bullet G' | \xi[i \dots j]] \cdot E[d_G(i + 1, j)]
\end{aligned}$$

Overall we get

$$EL_{sg} = (a + E[d_G(i + 1, j)]) \cdot Pr[G = \bullet G' | \xi[i \dots j]]$$

For the term  $EL_{bp(k)}$ , we have a similar reduction:

$$\begin{aligned}
EL_{bp(k)} &= \sum_{G=(\dots)_k G'} (b + d_{G'}(i, j)) Pr[G | \xi[i \dots j]] \\
&= \left( \sum_{G=(\dots)_k G'} b \cdot Pr[G | \xi[i \dots j]] \right) + \left( \sum_{G=(\dots)_k G'} d_{G'}(i, j) Pr[G | \xi[i \dots j]] \right) \\
&= (b \cdot Pr[G = (\dots)_k G' | \xi[i \dots j]]) + \left( \sum_{G=(\dots)_k G'} d_{G'}(i, j) Pr[G | \xi[i \dots j]] \right),
\end{aligned}$$

where  $Pr[G = (\dots)_k G' | \xi[i \dots j]] = \frac{Q_{ik}^b \cdot Q_{k+1,j}}{Q_{i,j}}$ .

Now

$$\begin{aligned}
\sum_{G=(\dots)_k G'} d_{G'}(i, j) Pr[G|\xi[i \dots j]] &= \sum_{G'} \sum_{G''=(G''')_k} d_{G'}(i, j) Pr[G''G'|\xi[i \dots j]] \\
&= \sum_{G'} \sum_{G''=(G''')_k} d_{G'}(i, j) \frac{\exp(E(G'')/kT) \exp(G'/kT)}{Q_{ij}} \\
&= \sum_{G'} \sum_{G''=(G''')_k} d_{G'}(i, j) \frac{\exp(E(G'')/kT) \exp(G'/kT)}{Q_{ij}} \\
&= \sum_{G'} d_{G'}(i, j) \frac{\left( \sum_{G''=(G''')_k} \exp(E(G'')/kT) \right) \exp(G'/kT)}{Q_{ij}} \\
&= \sum_{G'} d_{G'}(i, j) \frac{Q_{i,k}^b \exp(G'/kT)}{Q_{ij}}
\end{aligned}$$

Now we can again simply extend by  $Q_{k+1,j}$ , getting

$$\begin{aligned}
&= \sum_{G'} d_{G'}(i, j) \frac{Q_{i,k}^b \cdot Q_{k+1,j} \cdot \exp(G'/kT)}{Q_{ij} \cdot Q_{k+1,j}} \\
&= \sum_{G'} d_{G'}(i, j) \frac{Q_{i,k}^b \cdot Q_{k+1,j}}{Q_{ij}} \cdot \frac{\exp(G'/kT)}{Q_{k+1,j}} \\
&= Pr[G = (\dots)_k G'|\xi[i \dots j]] \sum_{G'} d_{G'}(i, j) Pr[G'|\xi[k+1 \dots j]] \\
&= Pr[G = (\dots)_k G'|\xi[i \dots j]] \cdot E[d_G(k+1, j)]
\end{aligned}$$

Overall we get

$$EL_{bp(k)} = (b + E[d_G(k+1, j)]) \cdot Pr[G = (\dots)_k G'|\xi[i \dots j]]$$

and thus the second summand.

## Appendix C: Notations

Table 1: **Basic notations**

| Notations        | Definitions                                                 |
|------------------|-------------------------------------------------------------|
| $x$              | RNA sequence                                                |
| $x[i..j]$        | subsequence $x_i, x_{i+1}, \dots, x_j$                      |
| $G$              | secondary structure viewed as a outerplanar graph $G(V, E)$ |
| $V$              | vertex set of $G$                                           |
| $E$              | edge set of $G$                                             |
| $B$              | set of elements in $E$ which are base pairs                 |
| $B_k$            | set of base pairs enclosing $k$                             |
| $\{i, j\} \in B$ | $\{i, j\}$ forms a base pair in $G$                         |
| $d_{v,w} = d$    | distance between $v$ and $w$ in $G$ is exactly $d$          |
| $d_{v,w}^I$      | inside distance between $v$ and $w$ in $G$                  |
| $d_{v,w}^O$      | outside distance between $v$ and $w$ in $G$                 |
| $n$              | length of the RNA sequence $x$                              |
| $a$              | edge weight of a backbone edge in $G$                       |
| $b$              | edge weight of a base pair edge in $G$                      |
| $D$              | number of distances considered                              |
| $c_b$            | $2b/lcd(a, b) + 1$                                          |

Table 2: **Notations of partition functions.** The (time) complexities are estimated under the assumption that positions of the start/end nucleotides  $v$  and  $w$  are given. <sup>†</sup>The complexity of  $Z_{p,q}^{v,w}[d_O, d_I]$  is estimated under the assumption that the partitions  $Z_{i,j}^{B,v}[d_\ell, d_r]$  for all  $i, j, d_\ell$  and  $d_r$  have been pre-computed. <sup>††</sup>The dominant complexity results from computing the partition function  $Z_{i,j}^{B,v}[d_\ell, d_r]$ .

| Notation                     | Interval | Restrictions                                       | Complexity                         | eqn. |
|------------------------------|----------|----------------------------------------------------|------------------------------------|------|
| $Q$                          | $[1, n]$ | –                                                  | $O(n^4)$                           | [1]  |
| $Z_{i,j}^I[d]$               | $[i, j]$ | $d_{i,j} = d$                                      | $O(n^3 D)$                         | 1    |
| $Z_{i,j}^J[d]$               | $[i, j]$ | $d_{i+1,j-1} = d$                                  | $O(n^3 D)$                         | 2    |
| $Z_0^{v,w}[d]$               | $[1, n]$ | $d_{v,w} = d \ \&\& \ B_v \cap B_w = \emptyset$    | $O(n^3 D^2)$                       | 4    |
| $Z_{p,q}^{v,w}[d_O, d_I]$    | $[p, q]$ | $\{p, q\} \in B, d_{v,w}^I = d_I, d_{v,w}^O = d_O$ | $O(n^3 D^4)^\dagger$               | 8    |
| $Z^{v,w}[d]$                 | $[1, n]$ | $d_{v,w} = d$                                      | $O(n^4 D^2 c_b^2)$                 | 9    |
| $Z_{i,j}^{B,v}[d_\ell, d_r]$ | $[i, j]$ | $\{i, j\} \in B, d_{v,i} = d_\ell, d_{v,j} = d_r$  | $O(n^4 D^2 c_b^2)^\dagger^\dagger$ | 10   |

## References

- [1] McCaskill, J.S.: The equilibrium partition function and base pair binding probabilities for RNA secondary structure. *Biopolymers* **29**(6-7), 1105–19 (1990)
