# Supplementary material for: Graph-distance distribution of the Boltzmann ensemble of RNA secondary structures
Source: Springer Nature journal article supplement (doi:10.1186/1748-7188-9-19), 2014-09-11
Supplement: 13015_2013_221_MOESM4_ESM.pdf [file 13015_2013_221_MOESM4_ESM.pdf]

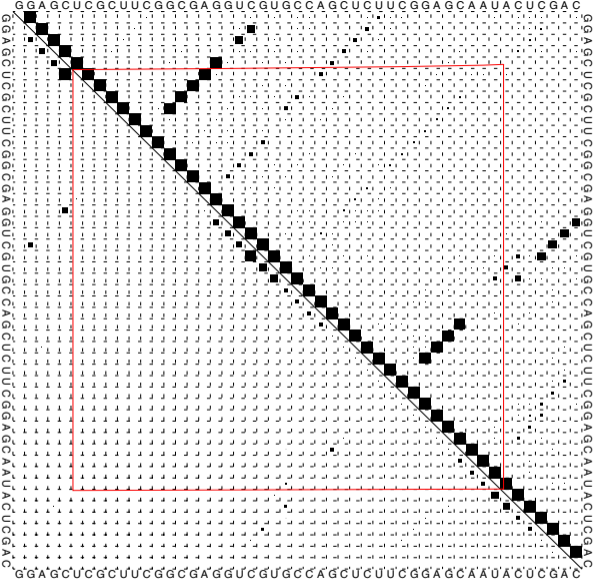

$T=37^\circ$

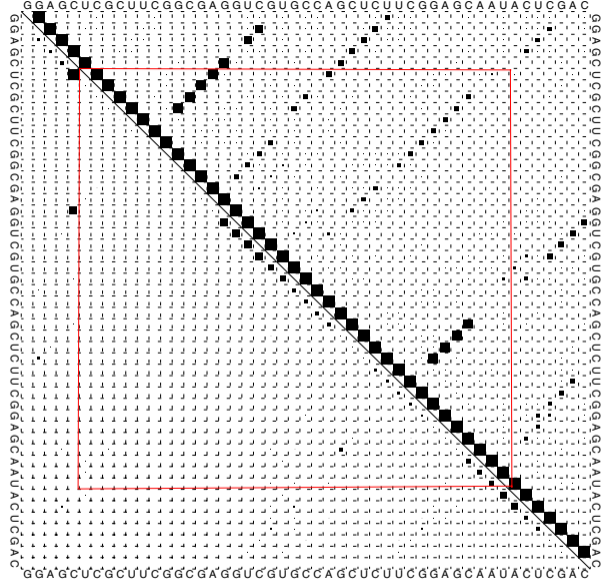

$T=50^\circ$
