# Supplementary material for: Graph-distance distribution of the Boltzmann ensemble of RNA secondary structures
Source: Springer Nature journal article supplement (doi:10.1186/1748-7188-9-19), 2014-09-11

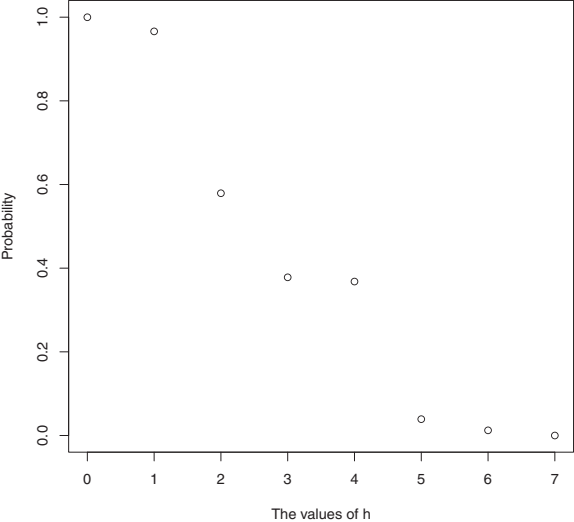

Supplement: 13015_2013_221_MOESM5_ESM.pdf [file 13015_2013_221_MOESM5_ESM.pdf]
